# Supplementary material for: Small molecule-mediated inhibition of translation by targeting a native RNA G-quadruplex
Source: Royal Society of Chemistry journal article supplement (doi:10.1039/c002418j), 2010-01-01
Supplement: c002418j.pdf [file c002418j.pdf]

# Supplementary Information

For

## “Small Molecule-Mediated Inhibition of Translation by Targeting a Native RNA G-Quadruplex”

*Anthony Bugaut<sup>‡</sup>, Raphaël Rodriguez<sup>‡</sup>, Sunita Kumari<sup>‡</sup>, Shang-Te Danny Hsu<sup>‡</sup> and*

*Shankar Balasubramanian<sup>‡,⊥,\*</sup>*

<sup>‡</sup>Department of Chemistry, University of Cambridge, Lensfield Road, Cambridge  
CB2 1EW, UK

<sup>⊥</sup> School of Clinical Medicine, University of Cambridge, Cambridge CB2 0SP, UK

Email: [sb10031@cam.ac.uk](mailto:sb10031@cam.ac.uk)

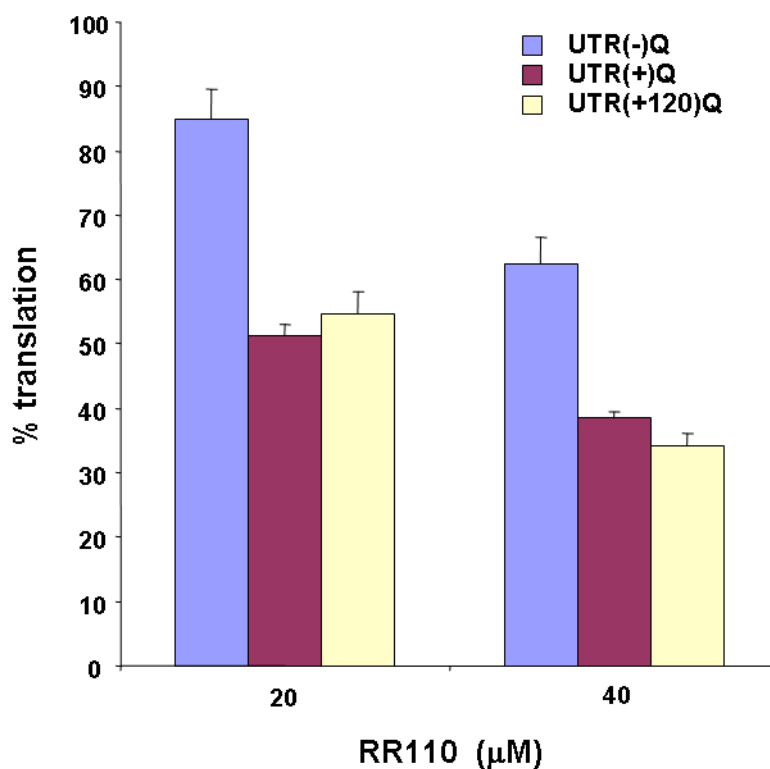

**Fig. S1** Relative *in vitro* translation efficiencies of NRAS UTR(-)Q, NRAS UTR(+Q and NRAS UTR(+120)Q mRNAs in the presence of the 20 and 40 μM of RR110, as measured by luciferase activities. For each construct, the measured luciferase activity was normalized to the activity obtained in the absence of the ligand, which was set as 100%. Experiments were performed at least three times using at least two separate batches of RNA. The average values are presented along with the standard error on the mean.

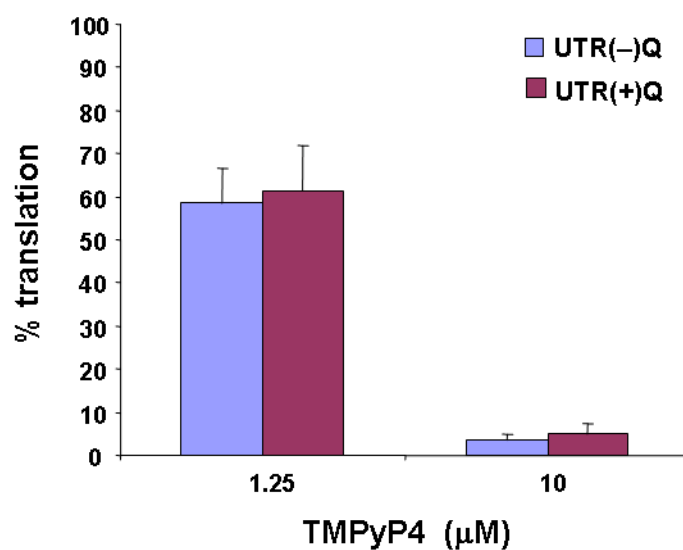

**Fig. S2** Relative translation efficiencies of NRAS UTR(-)Q and NRAS UTR(+Q) mRNAs in the presence of the indicated amounts of TMPyP4, as measured by luciferase activities. For each construct, the measured luciferase activity was normalized to the activity obtained in the absence of the ligand, which was set as 100%. Experiments were performed three times. The average values are presented along with the standard error on the mean.

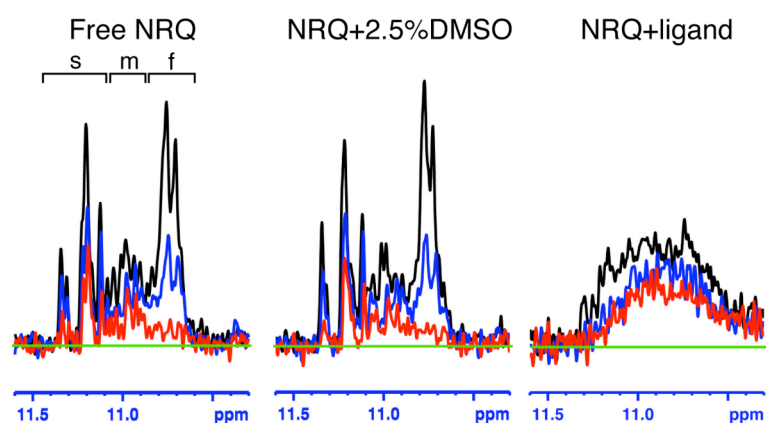

**Fig. S3** HDX analysis of the RNA G-quadruplex (NRQ) imino protons. Overlay of imino proton spectra of the NRQ recorded at different time points during the course of the HDX. The black, blue and red spectra correspond to 0, 0.5 and 12 hours after HDX, respectively. The states of the NRQ are indicated on the top panel and the baselines of individual spectra are shown in green. Regions of the slow (s), medium (m) and fast (f) exchanging imino protons are indicated on the left panel.

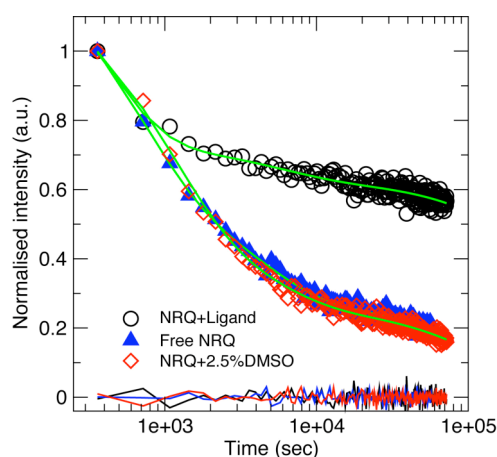

**Fig. S2** Rate analysis of the imino proton HDX of the RNA G-quadruplex (NRQ). The overall imino proton signals are integrated and normalized with respect to the first time point. The imino proton resonance intensities are plotted as a function of HDX time and are fitted to three exponentially decaying components with the fitting residuals shown below. The addition of DMSO alone has little effect to the HDX kinetics of the NRQ (filled blue triangle vs. open red diamond), while the binding of RR110 shows a significantly larger population of the exchangeable imino groups (open black circle), suggesting a stabilizing effect upon ligand binding.

| <b>Table S1</b> Analysis of the NMR imino proton hydrogen-deuterium exchange of the NRQ RNA G-quadruplex |                        |                          |                        |                          |                        |                          |
|----------------------------------------------------------------------------------------------------------|------------------------|--------------------------|------------------------|--------------------------|------------------------|--------------------------|
|                                                                                                          | Slow phase             |                          | Medium phase           |                          | Fast phase             |                          |
| Sample                                                                                                   | $A_s$ (%) <sup>a</sup> | $k_s$ (s <sup>-1</sup> ) | $A_m$ (%) <sup>a</sup> | $k_m$ (s <sup>-1</sup> ) | $A_f$ (%) <sup>a</sup> | $k_f$ (s <sup>-1</sup> ) |
| Free NRQ                                                                                                 | 21                     | 6.04e-6                  | 27                     | 2.47e-4                  | 52                     | 1.61e-3                  |
| NRQ+2.5% DMSO                                                                                            | 21                     | 6.26e-6                  | 19                     | 2.11e-4                  | 60                     | 1.00e-3                  |
| NRQ+RR110                                                                                                | 43                     | 1.61e-6                  | 8                      | 1.88e-4                  | 49                     | 2.78e-3                  |

a. The initial amplitudes are expressed in percentage of the total population after normalization by the sum of the initial amplitudes of the three phases.

## Synthesis of RR110

### General experimental

All solvents and reagents were purified by standard techniques reported in Perrin, D. D.; Armarego, W. L. F., *Purification of Laboratory Chemicals*, 3<sup>rd</sup> edition, Pergamon Press, Oxford, 1988 or used as supplied from commercial sources, as appropriate. NMR spectra were acquired on Bruker DRX-400, DPX-400 and DRX-500 instruments using deuterated solvents as detailed and at ambient probe temperature (300 K). Notation for the <sup>1</sup>H NMR spectral splitting patterns includes: singlet (*s*), doublet (*d*), triplet (*t*), broad (*br*) and multiplet/overlapping peaks (*m*). Signals are quoted as  $\delta$  values in ppm, coupling constants (*J*) are quoted in Hertz. Mass spectra were recorded on a Micromass Q-ToF (ESI) spectrometer. TLC was performed on Merck Kieselgel 60 F254 plates, and spots were visualised under UV light. Flash chromatography was performed using Merck Kieselgel 60 at rt under a positive pressure of nitrogen using distilled solvents. HPLC purifications were performed by using a Varian Pursuit C18, 5 $\mu$  column (250  $\times$  21.2 mm) at flow rate of 12.0 mL.min<sup>-1</sup>.

## Synthesis

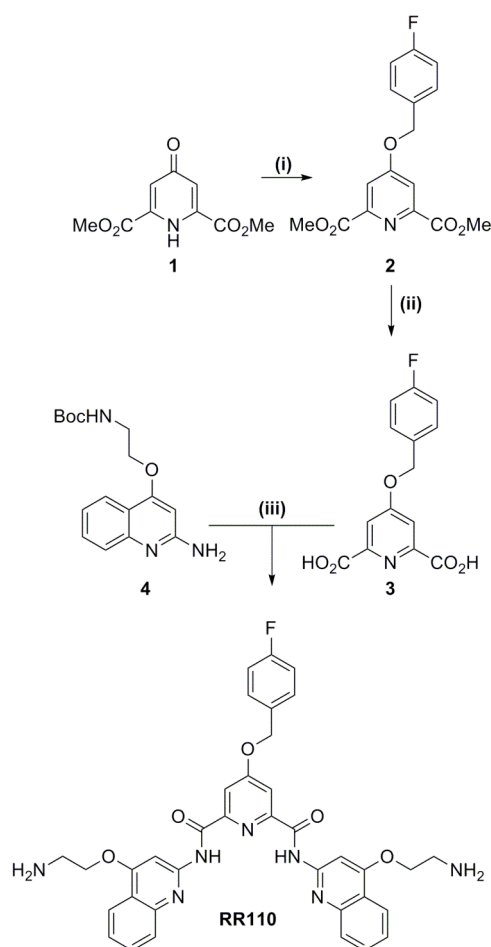

**Scheme S1** General scheme for the synthesis of RR110. (i) 4-Fluorobenzyl alcohol, triphenylphosphine, THF, DIAD, 0 °C to rt. (ii) aq. NaOH, MeOH, rt. (iii) **3**, **4**, pyridine, triphenylphosphite, 50 °C to 100 °C; then TFA/DCM, rt.

### Dimethyl-4-(4-fluoro-benzyloxy)-pyridine-2,6-dicarboxylate (**2**)

The known<sup>1</sup> chelidamic acid dimethyl ester (**1**) (200 mg, 0.9 mmol), 4-fluorobenzyl alcohol (154  $\mu$ l, 1.4 mmol) and triphenylphosphine (373 mg, 1.4 mmol) were dissolved in freshly distilled THF (5 ml) then cooled to 0 °C. DIAD (325  $\mu$ l, 1.7 mmol) was added dropwise under argon. The mixture was allowed to warm to rt and stirred for 3 days. The solvent was removed *in vacuo* and the product purified by

<sup>1</sup> R. Rodriguez, S. Müller, J. A. Yeoman, C. Trentesaux, J.-F. Riou and S. Balasubramanian *J. Am. Chem. Soc.*, 2008, **130**, 15758-15759.



column chromatography (50% EtOAc, 50% petroleum ether) to obtain the title compound as a white powder (200 mg, 0.6 mmol, 67%).  $^1\text{H}$  NMR (400 MHz,  $\text{CDCl}_3$ )  $\delta_{\text{H}}$  7.88 (2H, *s*), 7.45-7.40 (2H, *m*), 7.14-7.07 (2H, *m*), 5.20 (2H, *s*), 4.01 (6H, *s*);  $^{13}\text{C}$  NMR (100 MHz,  $\text{CDCl}_3$ )  $\delta_{\text{C}}$  166.5, 165.8, 162.9 (*d*, *J* 246 Hz), 149.9, 130.5, 122.7 (*d*, *J* 8 Hz), 115.8 (*d*, *J* 22 Hz), 114.7, 70.1, 53.2; HRMS (ES) calculated for  $\text{C}_{16}\text{H}_{14}\text{FNNaO}_5$  ( $[\text{M} + \text{Na}]^+$ ) *m/z*: 342.0748, found 342.0751.

### 4-(4-fluoro-benzyloxy)-pyridine-2,6-dicarboxylate (3)

An aqueous sodium hydroxide solution (2 M, 0.6 ml) was added dropwise to a solution of **2** (200 mg, 0.63 mmol) in MeOH (10.0 ml) at rt and the solution was stirred for 1 h. MeOH was removed *in vacuo*. A 5% formic acid solution was added dropwise to lower the pH to 3.0-4.0. The compound was then extracted with EtOAc. The organic layer was dried over  $\text{MgSO}_4$  and the solvent removed *in vacuo* to obtain compound **3** as a white powder (180 mg, 0.63 mmol, quantitative yield), which was used without further purification.

### 4-(4-Fluorobenzyloxy)pyridine-2,6-dicarboxylic acid bis-{{4-(2-aminoethoxy)quinolin-2-yl]amide}, trifluoroacetic acid salt (RR110)

Compound **3** (43 mg, 0.15 mmol) and the known<sup>1</sup> compound **4** (94 mg, 0.31 mmol) were dissolved in pyridine (1.0 ml) at 50 °C, stirred for 30 min, followed by the dropwise addition of triphenylphosphite (85  $\mu\text{l}$ , 0.32 mmol). The reaction mixture was warmed to 100 °C and stirred for 5 h under argon. After removal of the solvent *in vacuo*, The crude product was purified by column chromatography (50% EtOAc, 50% petroleum ether) to obtain a white powder which was dissolved in DCM (1.5 ml) and TFA (0.5 ml) and stirred for 4 h at rt. The solvent was removed *in vacuo* to give a

yellow solid which was purified by HPLC (gradient: 10 to 100% MeCN, 0.1% TFA over 20 min,  $R_t$ =15.0-16.0 min) to yield the title compound as a white powder (12 mg, 0.03 mmol, 8% yield over two steps).  $^1\text{H}$  NMR (500 MHz,  $\text{CD}_3\text{OD}$ )  $\delta_{\text{H}}$  8.49 (2H, *d*, *J* 8.5 Hz), 8.19 (2H, *s*), 8.18 (2H, *s*), 8.07 (2H, *d*, *J* 8.5 Hz), 7.94 (2H, *dd*, *J* 8.5, 8.0 Hz), 7.68 (2H, *dd*, *J* 8.5, 8.0 Hz), 7.61-7.57 (2H, *m*), 7.20-7.15 (2H, *m*), 5.45 (2H, *s*), 4.76 (4H, *t*, *J* 4.0 Hz), 3.68 (4H, *t*, *J* 4.0 Hz);  $^{13}\text{C}$  NMR (125 MHz,  $\text{CD}_3\text{OD}$ )  $\delta_{\text{C}}$  169.8, 166.7, 164.3 (*d*, *J* 245 Hz), 164.2, 152.5, 151.0, 143.7, 134.1, 132.8, 131.3 (*d*, *J* 8 Hz), 127.6, 124.5, 124.1, 120.2, 116.6 (*d*, *J* 22 Hz), 114.5, 95.3, 71.7, 67.6, 39.8; HRMS (ES) calculated for  $\text{C}_{36}\text{H}_{33}\text{FN}_7\text{O}_5$  ( $[\text{M} + \text{H}]^+$ ) *m/z*: 662.2521, found 662.2501.
